# Supplementary material for: Technical note: A comparison of methods for estimating coccolith mass
Source: Copernicus journal article supplement (doi:10.5194/bg-21-1601-2024), 2024-03-28
Supplement: Supplementary file 1 [file bg-21-1601-2024-supplement.zip]

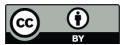

## *Supplement of*

# **Technical note: A comparison of methods for estimating coccolith mass**

**Celina Rebeca Valença et al.**

*Correspondence to:* Marius Nils Müller ([mariusnmuller@gmail.com](mailto:mariusnmuller@gmail.com))

- [bg-21-1601-2024-supplement-title-page.pdf](#)
- [Supplementary Material TABLE DATA.xlsx](#)
- [Supplementary Material TABLES.pdf](#)

The copyright of individual parts of the supplement might differ from the article licence.
