# Supplementary material for: Technical note: A comparison of methods for estimating coccolith mass
Source: Copernicus journal article supplement (doi:10.5194/bg-21-1601-2024), 2024-03-28
Supplement: Supplementary file 2 [file bg-21-1601-2024-supplement.zip]

## Supplementary Material

**Table S1:** Analysis of covariance (ANCOVA) and test for homogeneity of the linear regression slopes, comparing the individual strains of each ecotype.

| <b>Geometric parameter</b> | <b>ANCOVA</b> |          | <b>Test for homogeneity</b> |          |
|----------------------------|---------------|----------|-----------------------------|----------|
| <b>Ecotype A</b>           | <b>F</b>      | <b>p</b> | <b>F</b>                    | <b>p</b> |
| DSL                        | 0.52          | 0.489    | 0.17                        | 0.691    |
| DSW                        | 0.81          | 0.391    | 0.19                        | 0.676    |
| DSA                        | 0.42          | 0.534    | 0.19                        | 0.672    |
| CAL                        | 0.04          | 0.849    | 0.07                        | 0.797    |
| CAW                        | 0.33          | 0.581    | 0.14                        | 0.714    |
| CAA                        | 0.01          | 0.916    | 0.05                        | 0.832    |
| <b>Ecotype BC</b>          |               |          |                             |          |
| DSL                        | 1.45          | 0.268    | 2.26                        | 0.176    |
| DSW                        | 0.00          | 0.972    | 0.41                        | 0.542    |
| DSA                        | 2.43          | 0.163    | 1.45                        | 0.267    |
| CAL                        | 1.68          | 0.236    | 2.09                        | 0.192    |
| CAW                        | 0.12          | 0.742    | 0.04                        | 0.848    |
| CAA                        | 0.88          | 0.380    | 0.32                        | 0.589    |

**Table S2:** Linear regression analysis of geometric parameter of the two ecotypes in regard to seawater pH<sub>(total)</sub>.

| <b>Geometric parameter</b> | <b>Linear regression</b> | <b>r<sup>2</sup></b> | <b>n</b> | <b>p</b> |
|----------------------------|--------------------------|----------------------|----------|----------|
| <b>Ecotype A</b>           |                          |                      |          |          |
| DSL                        | y = -0.30x + 5.67        | 0.72                 | 12       | <0.001   |
| DSW                        | y = -0.27x + 4.92        | 0.70                 | 12       | <0.001   |
| DSA                        | y = -1.40x + 18.29       | 0.71                 | 12       | <0.001   |
| CAL                        | y = -0.15x + 2.92        | 0.34                 | 12       | 0.046    |
| CAW                        | y = -0.19x + 2.63        | 0.48                 | 12       | 0.013    |
| CAA                        | y = -0.38x + 4.55        | 0.38                 | 12       | 0.034    |
| <b>Ecotype BC</b>          |                          |                      |          |          |
| DSL                        | y = -0.31x + 5.83        | 0.89                 | 10       | <0.001   |
| DSW                        | y = -0.18x + 4.28        | 0.53                 | 10       | 0.017    |
| DSA                        | y = -1.97x + 23.15       | 0.81                 | 10       | <0.001   |
| CAL                        | y = -0.45x + 5.12        | 0.69                 | 10       | 0.003    |
| CAW                        | y = -0.37x + 3.95        | 0.83                 | 10       | <0.001   |
| CAA                        | y = -0.85x + 8.04        | 0.78                 | 10       | <0.001   |

**Table S3:** Linear regression analysis of coccolith mass estimates in regard to seawater pH<sub>(total)</sub>.

|                                     | <b>Linear regression</b> | <b><i>r</i><sup>2</sup></b> | <b><i>n</i></b> | <b><i>p</i></b> |
|-------------------------------------|--------------------------|-----------------------------|-----------------|-----------------|
| <b>Ecotype A</b>                    |                          |                             |                 |                 |
| Electron Microscopy                 | y = -0.553 x + 6.392     | 0.69                        | 12              | <0.001          |
| Coulter Multisizer                  | y = -0.767 x + 8.547     | 0.85                        | 12              | <0.001          |
| Bidirectional Circular Polarization | y = -0.318 x + 4.491     | 0.71                        | 12              | <0.001          |
| <b>Ecotype BC</b>                   |                          |                             |                 |                 |
| Electron Microscopy                 | y = -0.543 x + 5.944     | 0.83                        | 10              | <0.001          |
| Coulter Multisizer                  | y = 0.309 x - 0.239      | 0.14                        | 6               | 0.463           |
| Bidirectional Circular Polarization | y = -0.922 x + 9.008     | 0.24                        | 10              | 0.153           |
